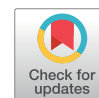

# The Toll of Lockdown Against COVID-19 on Diabetes Outpatient Care: Analysis From an Outbreak Area in Northeast Italy

*Diabetes Care* 2021;44:e18–e21 | <https://doi.org/10.2337/dc20-1872>

Benedetta Maria Bonora,  
Mario Luca Morieri, Angelo Avogaro,  
and Gian Paolo Fadini

After the spread of severe acute respiratory syndrome coronavirus 2 (SARS-CoV-2) from China, Italy became the second most affected country. One of the first outbreaks started in the municipality of Vo' in the Padua province of the Veneto region. The area was quarantined, and most residents with symptomatic coronavirus disease 2019 (COVID-19) were admitted to the Padua Hospital. Due to escalating numbers of cases, lockdown measures were imposed at a national level. Along with mass testing, such interventions helped with restraining SARS-CoV-2 diffusion (1). During lockdown, hospitals reorganized to care for COVID-19 patients. From 15 March 2020, outpatient visits were limited to nondeferrable ones, while other appointments were switched to telemedicine, postponed, or cancelled.

Diabetes is a key risk factor for severe COVID-19 (2), but the impact of lockdown on diabetes care is less appreciated. We analyzed the outpatient clinic database of the Padua Hospital, containing routine clinical data on demographics, anthropometrics, laboratory results, complications, and therapies. Patients had provided written informed consent for the reuse of anonymized data for research purposes. In agreement with national regulation, the local ethics committee (Padua, Italy) was notified of the protocol.

We first identified patients for whom a visit was available during lockdown from 15 March to 14 April 2020 and then identified patients seen in 2018 and 2019 in the same month to match for seasonal variations in access to the clinic. To account for year-to-year variations, we compared patients seen from 15 January–14 February in 2018, 2019, and 2020. We used a generalized estimating equation to compare clinical characteristics of patients seen during lockdown with characteristics of those attending the clinic in the same period of 2018–2019, adjusting for differences in the prelockdown period.

The number of visits (on-site or online) performed in the lockdown period was 47.7% lower than in the same month of the previous 2 years (660 vs. 1,208 and 1,316;  $P < 0.001$ ), while no substantial reduction was observed in the prelockdown month. The reduction was significantly greater for type 2 diabetes (T2D) (–53%) than for type 1 diabetes (T1D) (–40%;  $P < 0.001$ ). During lockdown, on-site visits had high priority due to emerging issues in diabetes management, glucose control, or complications, but most visits (82% for T2D and 95% for T1D) were performed via e-mail, telephone, and other media. Patients received remote consultations on health

status, review of laboratory exams and imaging studies, and discussion of issues related to diabetes management including pharmacotherapies. The obliged on-line approach affected the patients' ability to contact the clinic and attend the visit, particularly for those with T2D, who are older and arguably have less digital skills than patients with T1D. Patients with T2D assisted during lockdown as compared with those seen in previous years were significantly younger, had a shorter disease duration, and had a lower prevalence of microangiopathy and heart failure history, and they were not as often treated with metformin, sulfonylureas, glucagon-like peptide 1 receptor agonists (GLP-1RA), and antihypertensive, lipid-lowering, and antiplatelet medications (Table 1). As a mirror of these characteristics, we infer that aged T2D patients with a heavier complication burden and complex pharmacotherapies could not get in contact with the clinic for an on-site visit or remote consultation. This means that the toll of lockdown was paid by the most fragile patients, who needed more attention than others during limited functioning of many health care services.

Worryingly, the increase in the prescription of GLP-1RA observed prior to lockdown was significantly halted for T2D patients assisted during lockdown. Along

Department of Medicine, University of Padova, Padova, Italy

Corresponding author: Gian Paolo Fadini, [gianpaolo.fadini@unipd.it](mailto:gianpaolo.fadini@unipd.it)

Received 27 July 2020 and accepted 18 October 2020

This article is part of a special article collection available at <https://care.diabetesjournals.org/collection/diabetes-and-COVID19>.

B.M.B. and M.L.M. equally contributed.

© 2020 by the American Diabetes Association. Readers may use this article as long as the work is properly cited, the use is educational and not for profit, and the work is not altered. More information is available at <https://www.diabetesjournals.org/content/license>.

Table 1—Clinical characteristics of patients with T2D assisted before and during lockdown

|                                  |     | 15 January–14 February   |                    |       | 15 March–14 April        |                     |       |                  |                          |
|----------------------------------|-----|--------------------------|--------------------|-------|--------------------------|---------------------|-------|------------------|--------------------------|
|                                  |     | 2018–2019<br>(n = 1,527) | 2020<br>(n = 739)  | P     | 2018–2019<br>(n = 1,643) | 2020<br>(n = 387)   | P     |                  |                          |
| Overall, % available             |     |                          |                    |       |                          |                     |       | Effect direction | P <sub>Interaction</sub> |
| Demographics                     |     |                          |                    |       |                          |                     |       |                  |                          |
| Age, years                       | 100 | 69.7 ± 12.1              | 70.2 ± 12.4        | 0.388 | 69.5 ± 12.1              | 68.0 ± 14.6         | 0.053 | ↘                | 0.029                    |
| Female sex                       | 100 | 609 (39.9)               | 283 (38.3)         | 0.469 | 641 (39.0)               | 137 (35.4)          | 0.189 |                  | 0.537                    |
| T2D                              |     | 1,527 (100.0)            | 739 (100.0)        | —     | 1,643 (100.0)            | 387 (100.0)         | —     |                  | —                        |
| T1D                              |     | 0 (0.0)                  | 0 (0.0)            | —     | 0 (0.0)                  | 0 (0.0)             | —     |                  | —                        |
| Diabetes duration, years         | 91  | 13.1 (6.2–18.1)          | 14.3 (7.5–20.1)    | 0.005 | 14.1 (7.5–19.3)          | 14.1 (6.3–19.2)     | 0.461 | ↘                | 0.021                    |
| Anthropometrics                  |     |                          |                    |       |                          |                     |       |                  |                          |
| Weight, kg                       | 98  | 80.6 ± 16.9              | 79.9 ± 16.3        | 0.348 | 80.6 ± 16.5              | 81.2 ± 18.4         | 0.564 |                  | 0.308                    |
| BMI, kg/m <sup>2</sup>           | 96  | 28.8 ± 5.4               | 28.3 ± 5.1         | 0.042 | 28.8 ± 5.1               | 28.5 ± 5.6          | 0.509 |                  | 0.541                    |
| Other risk factor measures       |     |                          |                    |       |                          |                     |       |                  |                          |
| SBP, mmHg                        | 98  | 145.4 ± 21.8             | 147.5 ± 20.2       | 0.029 | 144.3 ± 21.6             | 144.8 ± 22.2        | 0.726 |                  | 0.307                    |
| DBP, mmHg                        | 98  | 78.2 ± 11.3              | 76.5 ± 11.9        | 0.003 | 77.9 ± 11.0              | 78.2 ± 11.0         | 0.672 | ↗                | 0.035                    |
| HbA <sub>1c</sub> , % (mmol/mol) | 95  | 7.5 ± 1.3 (58 ± 10)      | 7.5 ± 1.2 (58 ± 9) | 0.411 | 7.6 ± 1.3 (59 ± 10)      | 7.5 ± 1.3 (58 ± 10) | 0.129 |                  | 0.087                    |
| FBG, mg/dL                       | 87  | 156.8 ± 55.2             | 153.1 ± 47.0       | 0.143 | 158.7 ± 52.4             | 156.7 ± 58.6        | 0.612 |                  | 0.689                    |
| Total cholesterol, mg/dL         | 91  | 163.6 ± 39.0             | 158.2 ± 37.2       | 0.004 | 163.3 ± 38.9             | 156.5 ± 38.0        | 0.007 |                  | 0.658                    |
| HDL cholesterol, mg/dL           | 89  | 49.7 ± 14.2              | 49.9 ± 13.4        | 0.836 | 50.1 ± 14.6              | 48.9 ± 13.1         | 0.160 |                  | 0.221                    |
| Triglycerides, mg/dL             | 91  | 131.6 ± 109.0            | 131.9 ± 74.8       | 0.945 | 131.2 ± 83.1             | 130.9 ± 74.5        | 0.945 |                  | 0.924                    |
| LDL cholesterol, mg/dL           | 88  | 87.7 ± 31.7              | 82.1 ± 30.8        | 0.000 | 87.1 ± 31.7              | 80.4 ± 31.1         | 0.002 |                  | 0.627                    |
| Renal function                   |     |                          |                    |       |                          |                     |       |                  |                          |
| Creatinine, mg/dL                | 93  | 1.0 ± 0.6                | 1.1 ± 0.7          | 0.080 | 1.1 ± 0.8                | 1.1 ± 0.8           | 0.593 |                  | 0.342                    |
| eGFR, mL/min/1.73 m <sup>2</sup> | 93  | 74.8 ± 22.4              | 72.6 ± 22.7        | 0.048 | 73.5 ± 23.7              | 73.0 ± 24.1         | 0.731 |                  | 0.323                    |
| Normoalbuminuria                 | 79  | 729 (64.1)               | 364 (65.1)         | 0.669 | 783 (62.6)               | 156 (61.4)          | 0.725 |                  | 0.755                    |
| Microalbuminuria                 | 79  | 307 (27.0)               | 148 (26.5)         | 0.827 | 346 (27.7)               | 75 (29.5)           | 0.545 |                  | 0.727                    |
| Macroalbuminuria                 | 79  | 102 (9.0)                | 47 (8.4)           | 0.704 | 122 (9.8)                | 23 (9.1)            | 0.732 |                  | 0.970                    |
| Complications                    |     |                          |                    |       |                          |                     |       |                  |                          |
| Nephropathy                      | 100 | 593 (38.8)               | 293 (39.6)         | 0.710 | 682 (41.5)               | 149 (38.5)          | 0.279 |                  | 0.262                    |
| CKD stage III                    | 93  | 316 (25.7)               | 183 (29.0)         | 0.133 | 398 (27.8)               | 97 (30.7)           | 0.307 |                  | 0.881                    |
| Retinopathy                      | 70  | 327 (32.9)               | 162 (32.0)         | 0.712 | 353 (32.0)               | 59 (27.3)           | 0.175 |                  | 0.370                    |
| Neuropathy                       | 29  | 174 (49.2)               | 111 (51.6)         | 0.567 | 236 (49.0)               | 46 (47.4)           | 0.782 |                  | 0.569                    |
| MACE                             | 100 | 204 (13.4)               | 114 (15.4)         | 0.185 | 226 (13.8)               | 45 (11.6)           | 0.269 |                  | 0.061                    |
| PAD and foot disease             | 100 | 118 (7.7)                | 58 (7.8)           | 0.920 | 122 (7.4)                | 21 (5.4)            | 0.169 |                  | 0.244                    |
| Heart failure                    | 100 | 29 (1.9)                 | 20 (2.7)           | 0.218 | 39 (2.4)                 | 8 (2.1)             | 0.719 | ↘                | 0.022                    |
| Carotid atherosclerosis          | 100 | 625 (40.9)               | 311 (42.1)         | 0.601 | 683 (41.6)               | 138 (35.7)          | 0.033 | ↘                | 0.043                    |
| Any macroangiopathy              | 100 | 692 (45.3)               | 351 (47.5)         | 0.329 | 750 (45.6)               | 144 (37.2)          | 0.003 | ↘                | 0.003                    |
| Any microangiopathy              | 91  | 790 (60.9)               | 395 (61.6)         | 0.762 | 907 (63.0)               | 187 (60.1)          | 0.338 |                  | 0.630                    |

Continued on p. e20

Table 1—Continued

|                      | Overall, % available | 15 January–14 February   |                   |        | 15 March–14 April        |                   |       | Effect on lockdown visit |                          |
|----------------------|----------------------|--------------------------|-------------------|--------|--------------------------|-------------------|-------|--------------------------|--------------------------|
|                      |                      | 2018–2019<br>(n = 1,527) | 2020<br>(n = 739) | P      | 2018–2019<br>(n = 1,643) | 2020<br>(n = 387) | P     | Effect direction         | P <sub>interaction</sub> |
|                      |                      |                          |                   |        |                          |                   |       |                          |                          |
| Diabetes medications | 100                  | 1,415 (92.7)             | 711 (96.2)        | 0.001  | 1,534 (93.4)             | 362 (93.5)        | 0.901 | ↗                        | 0.030                    |
| Any insulin          | 100                  | 620 (40.6)               | 292 (39.5)        | 0.620  | 782 (47.6)               | 175 (45.2)        | 0.400 |                          | 0.743                    |
| Basal-bolus insulin  | 100                  | 387 (25.3)               | 157 (21.2)        | 0.033  | 490 (29.8)               | 95 (24.5)         | 0.040 |                          | 0.840                    |
| Metformin            | 100                  | 977 (64.0)               | 523 (70.8)        | 0.001  | 1,014 (61.7)             | 240 (62.0)        | 0.913 | ↗                        | 0.039                    |
| Secretagogues        | 100                  | 247 (16.2)               | 129 (17.5)        | 0.443  | 307 (18.7)               | 51 (13.2)         | 0.011 | ↗                        | 0.012                    |
| Pioglitazone         | 100                  | 30 (2.0)                 | 13 (1.8)          | 0.737  | 36 (2.2)                 | 5 (1.3)           | 0.264 |                          | 0.544                    |
| DPP-4 inhibitors     | 100                  | 368 (24.1)               | 182 (24.6)        | 0.783  | 369 (22.5)               | 84 (21.7)         | 0.749 |                          | 0.652                    |
| GLP-1RA              | 100                  | 131 (8.6)                | 142 (19.2)        | <0.001 | 153 (9.3)                | 52 (13.4)         | 0.016 | ↗                        | 0.013                    |
| SGLT2 inhibitors     | 100                  | 105 (6.9)                | 84 (11.4)         | <0.001 | 89 (5.4)                 | 28 (7.2)          | 0.169 |                          | 0.355                    |
| Other medications    |                      |                          |                   |        |                          |                   |       |                          |                          |
| Antihypertensive     | 100                  | 1,225 (80.2)             | 610 (82.5)        | 0.187  | 1,330 (80.9)             | 291 (75.2)        | 0.011 | ↗                        | 0.004                    |
| ACEi/ARB             | 100                  | 1,007 (65.9)             | 495 (67.0)        | 0.625  | 1,055 (64.2)             | 233 (60.2)        | 0.142 |                          | 0.129                    |
| Lipid lowering       | 100                  | 1,082 (70.9)             | 540 (73.1)        | 0.274  | 1,148 (69.9)             | 255 (65.9)        | 0.128 | ↗                        | 0.049                    |
| Statin               | 100                  | 997 (65.3)               | 506 (68.5)        | 0.134  | 1,068 (65.0)             | 242 (62.5)        | 0.361 |                          | 0.080                    |
| Antiplatelet         | 100                  | 810 (53.0)               | 389 (52.6)        | 0.856  | 827 (50.3)               | 166 (42.9)        | 0.009 | ↗                        | 0.043                    |
| Diuretics            | 100                  | 717 (47.0)               | 360 (48.7)        | 0.432  | 759 (46.2)               | 162 (41.9)        | 0.124 |                          | 0.078                    |
| β-Blockers           | 100                  | 534 (35.0)               | 279 (37.8)        | 0.196  | 598 (36.4)               | 133 (34.4)        | 0.454 |                          | 0.152                    |
| Anticoagulants       | 100                  | 152 (10.0)               | 79 (10.7)         | 0.587  | 178 (10.8)               | 54 (14.0)         | 0.084 |                          | 0.320                    |

Data are means ± SD or n (%) unless otherwise indicated. We show data for patients who attended the outpatient clinic physically or by remote contact in 2018–2019 and in 2020 during the month from 15 January to 14 February (prelockdown control) and during one lockdown month (from 15 March to 14 April). Effect direction: ↗, higher (or positive) value associated with less probability of visits during lockdown; ↘, higher (or positive) value associated with higher probability of visits during lockdown. ACEi, ACE inhibitors; ARB, angiotensin receptor blockers; CKD, chronic kidney disease; DBP, diastolic blood pressure; eGFR, estimated glomerular filtration rate; DPP-4, dipeptidyl peptidase 4; FPG, fasting plasma glucose; MACE, major adverse cardiovascular events; PAD, peripheral arterial disease; SBP, systolic blood pressure; SGLT2, sodium–glucose cotransporter 2.

with the reduced use of antiplatelet agents and lipid-lowering therapies, this suggests a less appropriate management of cardiovascular risk. During lockdown, emergency accesses for cardiovascular events dropped all over the world (3). In this unprecedented situation, patients with an event did not seek care, thereby posing themselves at increased risk of death or adverse sequelae, such as heart failure. Thus, treatment of patients with drugs that prevent fatal and nonfatal cardiovascular events and heart failure becomes even more important.

No significant difference was noted in the characteristics of patients with T1D attending the clinic during lockdown compared with 2018–2019, suggesting no specific issues in the management of these patients during lockdown. The frequent use of cloud-connected sensors allowed people with T1D to seek advice outside the scheduled visits (4,5). Not all people with T1D may be exempt from

the adverse consequences of lockdown, but they are probably more resilient to such challenge, possibly thanks to the widespread use of technology.

Preparing for the next pandemic phase, we should develop strategies that prevent the decrease in care for people with T2D, giving priority to allowing access to those who most need assistance.

---

**Funding.** This work was supported by the University of Padova Department of Medicine (CARIPARO grant, COVIDIMED project).

**Duality of Interest.** No potential conflicts of interest relevant to this article were reported.

**Author Contributions.** B.M.B. contributed to study design, data analysis and interpretation, and manuscript writing. M.L.M. contributed to study design, data analysis and interpretation, and manuscript writing. A.A. contributed to study design and supervision and manuscript revision. G.P.F. contributed to study design and interpretation and manuscript writing. All authors approved the final version of the manuscript. G.P.F. and M.L.M. are the guarantors of this work and, as such, had full access to all the data in the study

and take responsibility for the integrity of the data and the accuracy of the data analysis.

## References

1. Lavezzo E, Franchin E, Ciavarella C, et al.; Imperial College COVID-19 Response Team. Suppression of a SARS-CoV-2 outbreak in the Italian municipality of Vo'. *Nature* 2020;584:425–429
2. Fadini GP, Morieri ML, Boscari F, et al. Newly-diagnosed diabetes and admission hyperglycemia predict COVID-19 severity by aggravating respiratory deterioration. *Diabetes Res Clin Pract* 2020;168:108374
3. Piccolo R, Bruzzese D, Mauro C, et al.; Collaborators. Population trends in rates of percutaneous coronary revascularization for acute coronary syndromes associated with the COVID-19 outbreak. *Circulation* 2020;141:2035–2037
4. Maddaloni E, Coraggio L, Pieralice S, Carlone A, Pozzilli P, Buzzetti R. Effects of COVID-19 lockdown on glucose control: continuous glucose monitoring data from people with diabetes on intensive insulin therapy. *Diabetes Care* 2020; 43:e86–e87
5. Bonora BM, Boscari F, Avogaro A, Bruttomesso D, Fadini GP. Glycaemic control among people with type 1 diabetes during lockdown for the SARS-CoV-2 outbreak in Italy. *Diabetes Ther* 2020; 11:1369–1379
